# Supplementary material
Source: PubMed Central journal article supplement (PMC3909218)
Supplement: NIHMS536260-supplement-01.pdf [file NIHMS536260-supplement-01.pdf]

**Supplemental Figures and Text**

| <b>Strain Genotype</b>                                                                                    | <b>Lab Name</b> | <b>Figure</b> | <b>Reference</b>   |
|-----------------------------------------------------------------------------------------------------------|-----------------|---------------|--------------------|
| <i>h90 ura4D18 leu1-32 ade6-210</i>                                                                       | pB47            | 1-5,S4        | This study         |
| <i>mat1M ::p3nmt1-kan Dmat2.3 ::LEU2 rhp51 ::ura4+ ars1 ::swi1-LEU2 ura4D18 leu1-32 ade6-216</i>          | pB298           | 1             | This study         |
| <i>h90 lsd1-E918 ura4D18 leu1-32 ade6-216</i>                                                             | pB306           | 1,3,4,S4      | This study         |
| <i>mat1 ::Msmt-0 leu1-32 ade6-210</i>                                                                     | pB10            | 2             | This study         |
| <i>mat1 ::Msmt-0 lsd1-E918 ura4D18 leu1-32 ade6-210</i>                                                   | pB321           | 2             | This study         |
| <i>h90 lsd1 ::ura4+ ura4D18 leu1-32 ade6-210</i>                                                          | pB346           | 2,5           | This study         |
| <i>h90 lsd1-W891A ura4D18 leu1-32 ade6-216</i>                                                            | pB389           | 2,5           | This study         |
| <i>h90 lsd1-P946 ura4D18 leu1-32 ade6-210</i>                                                             | pB392           | 2             | This study         |
| <i>h90 lsd1-aoKK613,614AA ::Cter HA-clonat ura4D18 leu1-32 ade6-216</i>                                   | pB404           | 3, 4          | This study, Y. Shi |
| <i>h90 lsd2-aoKK861,862AA ::Cter Myc-kan ura4D18 leu1-32 ade6-216</i>                                     | pB405           | 3, 4          | This study, Y. Shi |
| <i>h90 lsd1-aoKK613,614AA ::Cter HA-clonat lsd2-aoKK861,862AA ::Cter Myc-kan ura4D18 leu1-32 ade6-216</i> | pB406           | 3, 4          | This study, Y. Shi |
| <i>h90 lsd1-E918 set1 ::kan ura4D18 leu1-32 ade6-210</i>                                                  | pB339           | 3             | This study         |
| <i>h90 set1 ::kan ura4D18 leu1-32 ade6-210</i>                                                            | pB340           | 3             | This study         |
| <i>h90 clr4 ::kan set1 ::kan ura4D18 leu1-32 ade6-210</i>                                                 | pB412           | 3             | This study         |
| <i>h90 lsd1-E918 clr4 ::kan leu1-32</i>                                                                   | pB443           | 3             | This study         |
| <i>h90 clr4 ::kan leu1-32 ade6-216</i>                                                                    | pB444           | 3             | This study         |
| <i>h90 lsd1-W891A ::Cter HA-kan ura4D18 leu1-32 ade6-216</i>                                              | pB394           | 4, S1         | This study         |
| <i>h90 Lsd1 ::Myc-kan ura4D18 leu1-32 ade6-216</i>                                                        | pB458           | 4, S3         | This study         |
| <i>h90 Lsd2 ::Myc-kan ade6-216</i>                                                                        | pB432           | 4,S1,S3       | This study, Y. Shi |
| <i>h90 Lsd2 ::Myc-kan lsd1-E918 ura4D18 leu1-32 ade6-216</i>                                              | pB433           | 4,S1          | This study, Y. Shi |
| <i>h90 Lsd1 ::HA-kan ura4D18 leu1-32 ade6-216</i>                                                         | pB305           | 4,5,S1        | This study         |
| <i>h90 Lsd1 ::HA-kan swi1 ::kan ura4D18 leu1-32 ade6-210</i>                                              | pB345           | 4,5           | This study         |
| <i>h90 Swi1 ::HA-kan ura4D18 leu1-32 ade6-216</i>                                                         | pB113           | 4             | This study         |
| <i>h90 swi1 ::kan ura4D18 leu1-32 ade6-210</i>                                                            | pB337           | 4             | This study         |
| <i>h90 lsd1-E918 Swi1 ::HA-kan ura4D18 leu1-32 ade6-210</i>                                               | pB357           | 4             | This study         |
| <i>h90 mat1 ::D13-LEU2 swi6 leu1-32 ade6-216</i>                                                          | pB55            | 4             | This study         |

|                                                                                          |       |    |                       |
|------------------------------------------------------------------------------------------|-------|----|-----------------------|
| <i>mat1M Dmat2.3 ::LEU2 Lsd1 ::Myc-kan</i>                                               | pB495 | 4  | This study            |
| <i>mat1M ::DSS2 Dmat2.3 ::LEU2 Lsd1 ::Myc-kan</i>                                        | pB490 | 4  | This study            |
| <i>M-smt0 sup35 :nmt41 ::rft1 ura4 :RTS1 ura4D18 leu1-32 ade6-704 lsd1-HA ::kan</i>      | pB498 | 5  | This study,S. Lambert |
| <i>M-smt0 sup35 :nmt41 ::rft1 ura4 :RTS1 ura4D18 leu1-32 ade6-704 lsd1-W891A-HA::kan</i> | pB499 | 5  | This study,S. Lambert |
| <i>mat1M::p3nmt1-kan Dmat2.3::LEU2 Lsd1::HA-kan cdc25-11 ura4D18 leu1-32 ade6-210</i>    | pB359 | S2 | This study            |
| <i>h90 Lsd1 ::Myc-kan lid2-jD ::LEU2 ura4D18 leu1-32 ade6-216</i>                        | pB460 | S3 | This study            |
| <i>h90 set9 ::kan ura4D18 leu1-32 ade6-210</i>                                           | pB344 | S4 | This study            |
| <i>h90 lsd1-E918 set9 ::kan ura4D18 leu1-32 ade6-210</i>                                 | pB343 | S4 | This study            |
| <i>h90 set6 ::kan leu1-32 ade6-210</i>                                                   | pB342 | S4 | This study            |
| <i>h90 lsd1-E918 set6 ::kan ura4D18 leu1-32 ade6-210</i>                                 | pB341 | S4 | This study            |
